# Supplementary material for: Whole-genome sequence and genesis of an avian influenza virus H5N1 isolated from a healthy chicken in a live bird market in Indonesia: accumulation of mammalian adaptation markers in avian hosts
Source: PeerJ. 2023 Feb 21;11:e14917. doi: 10.7717/peerj.14917 (PMC9951803; doi:10.7717/peerj.14917)
Supplement: Supplemental Information 1 [file peerj-11-14917-s001.xls]

## Sheet: Acknowledge Table
Table S1. Accession number and Isolate-ID in the GISAID database for viruses used as a reference.
We gratefully acknowledge the authors, originating and submitting laboratories of the sequences from GISAID’s EpiFlu™ Database on which this research is based. The list is detailed below.
All submitters of data may be contacted directly via www.gisaid.org
Segment ID (accession #)	Segment	Country	Collection date	Isolate-ID	Isolate name	Originating Lab	Submitting Lab	Authors
EPI1009459	PA	Indonesia	2016-Mar-07	EPI_ISL_266799	A/eagle/Jakarta Timur/20616-206-III/2016		Import from public-domain	Wibawa,H.; Poermadjaja,B.; Mulyawan,H.; Dharmawan,R.; Mahawan,T.; Hutagaol,N.M.; Miswati,Y.; Srihanto,E.A.; Hartawan,D.H.W.; Hendrawati,F.; Riyadi,A.; Deswarni; Tri Harsono,A.; Hartaningsih,N.; Azhar,M.; Stegemen,A.; Mc Grane,J.; Rasa,F.S.T.
EPI1009462	NA	Indonesia	2016-Mar-07	EPI_ISL_266799	A/eagle/Jakarta Timur/20616-206-III/2016		Import from public-domain	Wibawa,H.; Poermadjaja,B.; Mulyawan,H.; Dharmawan,R.; Mahawan,T.; Hutagaol,N.M.; Miswati,Y.; Srihanto,E.A.; Hartawan,D.H.W.; Hendrawati,F.; Riyadi,A.; Deswarni; Tri Harsono,A.; Hartaningsih,N.; Azhar,M.; Stegemen,A.; Mc Grane,J.; Rasa,F.S.T.
EPI1009463	MP	Indonesia	2016-Mar-07	EPI_ISL_266799	A/eagle/Jakarta Timur/20616-206-III/2016		Import from public-domain	Wibawa,H.; Poermadjaja,B.; Mulyawan,H.; Dharmawan,R.; Mahawan,T.; Hutagaol,N.M.; Miswati,Y.; Srihanto,E.A.; Hartawan,D.H.W.; Hendrawati,F.; Riyadi,A.; Deswarni; Tri Harsono,A.; Hartaningsih,N.; Azhar,M.; Stegemen,A.; Mc Grane,J.; Rasa,F.S.T.
EPI1009457	PB2	Indonesia	2016-Mar-07	EPI_ISL_266799	A/eagle/Jakarta Timur/20616-206-III/2016		Import from public-domain	Wibawa,H.; Poermadjaja,B.; Mulyawan,H.; Dharmawan,R.; Mahawan,T.; Hutagaol,N.M.; Miswati,Y.; Srihanto,E.A.; Hartawan,D.H.W.; Hendrawati,F.; Riyadi,A.; Deswarni; Tri Harsono,A.; Hartaningsih,N.; Azhar,M.; Stegemen,A.; Mc Grane,J.; Rasa,F.S.T.
EPI1009458	PB1	Indonesia	2016-Mar-07	EPI_ISL_266799	A/eagle/Jakarta Timur/20616-206-III/2016		Import from public-domain	Wibawa,H.; Poermadjaja,B.; Mulyawan,H.; Dharmawan,R.; Mahawan,T.; Hutagaol,N.M.; Miswati,Y.; Srihanto,E.A.; Hartawan,D.H.W.; Hendrawati,F.; Riyadi,A.; Deswarni; Tri Harsono,A.; Hartaningsih,N.; Azhar,M.; Stegemen,A.; Mc Grane,J.; Rasa,F.S.T.
EPI1009460	HA	Indonesia	2016-Mar-07	EPI_ISL_266799	A/eagle/Jakarta Timur/20616-206-III/2016		Import from public-domain	Wibawa,H.; Poermadjaja,B.; Mulyawan,H.; Dharmawan,R.; Mahawan,T.; Hutagaol,N.M.; Miswati,Y.; Srihanto,E.A.; Hartawan,D.H.W.; Hendrawati,F.; Riyadi,A.; Deswarni; Tri Harsono,A.; Hartaningsih,N.; Azhar,M.; Stegemen,A.; Mc Grane,J.; Rasa,F.S.T.
EPI1009461	NP	Indonesia	2016-Mar-07	EPI_ISL_266799	A/eagle/Jakarta Timur/20616-206-III/2016		Import from public-domain	Wibawa,H.; Poermadjaja,B.; Mulyawan,H.; Dharmawan,R.; Mahawan,T.; Hutagaol,N.M.; Miswati,Y.; Srihanto,E.A.; Hartawan,D.H.W.; Hendrawati,F.; Riyadi,A.; Deswarni; Tri Harsono,A.; Hartaningsih,N.; Azhar,M.; Stegemen,A.; Mc Grane,J.; Rasa,F.S.T.
EPI1009347	NS	Indonesia	2016-Mar-07	EPI_ISL_266799	A/eagle/Jakarta Timur/20616-206-III/2016		Import from public-domain	Wibawa,H.; Poermadjaja,B.; Mulyawan,H.; Dharmawan,R.; Mahawan,T.; Hutagaol,N.M.; Miswati,Y.; Srihanto,E.A.; Hartawan,D.H.W.; Hendrawati,F.; Riyadi,A.; Deswarni; Tri Harsono,A.; Hartaningsih,N.; Azhar,M.; Stegemen,A.; Mc Grane,J.; Rasa,F.S.T.
EPI1494573	PB1	Indonesia	2013-Sep-11	EPI_ISL_307002	A/turkey/East_Java/Av154/2013	Institute of Tropical Disease, Universitas Airlangga	Kobe University Graduate School of Medicine	AM,Nastri; AL,Poetranto; ED,Poetranto; SPA,Wahyuningsih; W,Darmanto; EF,Puruhito; L,Wulandari; G,Soegiarto; YK,Shimizu; Y,Mori; K,Shimizu
EPI1494578	NS	Indonesia	2013-Sep-11	EPI_ISL_307002	A/turkey/East_Java/Av154/2013	Institute of Tropical Disease, Universitas Airlangga	Kobe University Graduate School of Medicine	AM,Nastri; AL,Poetranto; ED,Poetranto; SPA,Wahyuningsih; W,Darmanto; EF,Puruhito; L,Wulandari; G,Soegiarto; YK,Shimizu; Y,Mori; K,Shimizu
EPI1498094	NA	Indonesia	2013-Sep-11	EPI_ISL_307002	A/turkey/East_Java/Av154/2013	Institute of Tropical Disease, Universitas Airlangga	Kobe University Graduate School of Medicine	AM,Nastri; AL,Poetranto; ED,Poetranto; SPA,Wahyuningsih; W,Darmanto; EF,Puruhito; L,Wulandari; G,Soegiarto; YK,Shimizu; Y,Mori; K,Shimizu
EPI1494572	PB2	Indonesia	2013-Sep-11	EPI_ISL_307002	A/turkey/East_Java/Av154/2013	Institute of Tropical Disease, Universitas Airlangga	Kobe University Graduate School of Medicine	AM,Nastri; AL,Poetranto; ED,Poetranto; SPA,Wahyuningsih; W,Darmanto; EF,Puruhito; L,Wulandari; G,Soegiarto; YK,Shimizu; Y,Mori; K,Shimizu
EPI1494574	PA	Indonesia	2013-Sep-11	EPI_ISL_307002	A/turkey/East_Java/Av154/2013	Institute of Tropical Disease, Universitas Airlangga	Kobe University Graduate School of Medicine	AM,Nastri; AL,Poetranto; ED,Poetranto; SPA,Wahyuningsih; W,Darmanto; EF,Puruhito; L,Wulandari; G,Soegiarto; YK,Shimizu; Y,Mori; K,Shimizu
EPI1494575	NP	Indonesia	2013-Sep-11	EPI_ISL_307002	A/turkey/East_Java/Av154/2013	Institute of Tropical Disease, Universitas Airlangga	Kobe University Graduate School of Medicine	AM,Nastri; AL,Poetranto; ED,Poetranto; SPA,Wahyuningsih; W,Darmanto; EF,Puruhito; L,Wulandari; G,Soegiarto; YK,Shimizu; Y,Mori; K,Shimizu
EPI1494576	NA	Indonesia	2013-Sep-11	EPI_ISL_307002	A/turkey/East_Java/Av154/2013	Institute of Tropical Disease, Universitas Airlangga	Kobe University Graduate School of Medicine	AM,Nastri; AL,Poetranto; ED,Poetranto; SPA,Wahyuningsih; W,Darmanto; EF,Puruhito; L,Wulandari; G,Soegiarto; YK,Shimizu; Y,Mori; K,Shimizu
EPI1494577	MP	Indonesia	2013-Sep-11	EPI_ISL_307002	A/turkey/East_Java/Av154/2013	Institute of Tropical Disease, Universitas Airlangga	Kobe University Graduate School of Medicine	AM,Nastri; AL,Poetranto; ED,Poetranto; SPA,Wahyuningsih; W,Darmanto; EF,Puruhito; L,Wulandari; G,Soegiarto; YK,Shimizu; Y,Mori; K,Shimizu
EPI1215564	HA	Indonesia	2013-Sep-11	EPI_ISL_307002	A/turkey/East_Java/Av154/2013	Institute of Tropical Disease, Universitas Airlangga	Kobe University Graduate School of Medicine	AM,Nastri; AL,Poetranto; ED,Poetranto; SPA,Wahyuningsih; W,Darmanto; EF,Puruhito; L,Wulandari; G,Soegiarto; YK,Shimizu; Y,Mori; K,Shimizu
EPI1215584	HA	Indonesia	2014-Feb-01	EPI_ISL_307019	A/chicken/East_Java/Av240/2014	Institute of Tropical Disease, Universitas Airlangga	Kobe University Graduate School of Medicine	AM,Nastri; AL,Poetranto; ED,Poetranto; SPA,Wahyuningsih; W,Darmanto; EF,Puruhito; L,Wulandari; G,Soegiarto; YK,Shimizu; Y,Mori; K,Shimizu
EPI1494570	MP	Indonesia	2014-Feb-01	EPI_ISL_307019	A/chicken/East_Java/Av240/2014	Institute of Tropical Disease, Universitas Airlangga	Kobe University Graduate School of Medicine	AM,Nastri; AL,Poetranto; ED,Poetranto; SPA,Wahyuningsih; W,Darmanto; EF,Puruhito; L,Wulandari; G,Soegiarto; YK,Shimizu; Y,Mori; K,Shimizu
EPI1494557	PB2	Indonesia	2014-Feb-01	EPI_ISL_307019	A/chicken/East_Java/Av240/2014	Institute of Tropical Disease, Universitas Airlangga	Kobe University Graduate School of Medicine	AM,Nastri; AL,Poetranto; ED,Poetranto; SPA,Wahyuningsih; W,Darmanto; EF,Puruhito; L,Wulandari; G,Soegiarto; YK,Shimizu; Y,Mori; K,Shimizu
EPI1494566	PB1	Indonesia	2014-Feb-01	EPI_ISL_307019	A/chicken/East_Java/Av240/2014	Institute of Tropical Disease, Universitas Airlangga	Kobe University Graduate School of Medicine	AM,Nastri; AL,Poetranto; ED,Poetranto; SPA,Wahyuningsih; W,Darmanto; EF,Puruhito; L,Wulandari; G,Soegiarto; YK,Shimizu; Y,Mori; K,Shimizu
EPI1498122	NA	Indonesia	2014-Feb-01	EPI_ISL_307019	A/chicken/East_Java/Av240/2014	Institute of Tropical Disease, Universitas Airlangga	Kobe University Graduate School of Medicine	AM,Nastri; AL,Poetranto; ED,Poetranto; SPA,Wahyuningsih; W,Darmanto; EF,Puruhito; L,Wulandari; G,Soegiarto; YK,Shimizu; Y,Mori; K,Shimizu
EPI1494569	NA	Indonesia	2014-Feb-01	EPI_ISL_307019	A/chicken/East_Java/Av240/2014	Institute of Tropical Disease, Universitas Airlangga	Kobe University Graduate School of Medicine	AM,Nastri; AL,Poetranto; ED,Poetranto; SPA,Wahyuningsih; W,Darmanto; EF,Puruhito; L,Wulandari; G,Soegiarto; YK,Shimizu; Y,Mori; K,Shimizu
EPI1494567	PA	Indonesia	2014-Feb-01	EPI_ISL_307019	A/chicken/East_Java/Av240/2014	Institute of Tropical Disease, Universitas Airlangga	Kobe University Graduate School of Medicine	AM,Nastri; AL,Poetranto; ED,Poetranto; SPA,Wahyuningsih; W,Darmanto; EF,Puruhito; L,Wulandari; G,Soegiarto; YK,Shimizu; Y,Mori; K,Shimizu
EPI1494568	NP	Indonesia	2014-Feb-01	EPI_ISL_307019	A/chicken/East_Java/Av240/2014	Institute of Tropical Disease, Universitas Airlangga	Kobe University Graduate School of Medicine	AM,Nastri; AL,Poetranto; ED,Poetranto; SPA,Wahyuningsih; W,Darmanto; EF,Puruhito; L,Wulandari; G,Soegiarto; YK,Shimizu; Y,Mori; K,Shimizu
EPI1494571	NS	Indonesia	2014-Feb-01	EPI_ISL_307019	A/chicken/East_Java/Av240/2014	Institute of Tropical Disease, Universitas Airlangga	Kobe University Graduate School of Medicine	AM,Nastri; AL,Poetranto; ED,Poetranto; SPA,Wahyuningsih; W,Darmanto; EF,Puruhito; L,Wulandari; G,Soegiarto; YK,Shimizu; Y,Mori; K,Shimizu
EPI1215595	NP	Indonesia	2013-Jun-26	EPI_ISL_307026	A/duck/East_Java/Av39/2013	Institute of Tropical Disease, Universitas Airlangga	Kobe University Graduate School of Medicine	AM,Nastri; AL,Poetranto; ED,Poetranto; SPA,Wahyuningsih; W,Darmanto; EF,Puruhito; L,Wulandari; G,Soegiarto; YK,Shimizu; Y,Mori; K,Shimizu
EPI1215598	NS	Indonesia	2013-Jun-26	EPI_ISL_307026	A/duck/East_Java/Av39/2013	Institute of Tropical Disease, Universitas Airlangga	Kobe University Graduate School of Medicine	AM,Nastri; AL,Poetranto; ED,Poetranto; SPA,Wahyuningsih; W,Darmanto; EF,Puruhito; L,Wulandari; G,Soegiarto; YK,Shimizu; Y,Mori; K,Shimizu
EPI1215592	PB2	Indonesia	2013-Jun-26	EPI_ISL_307026	A/duck/East_Java/Av39/2013	Institute of Tropical Disease, Universitas Airlangga	Kobe University Graduate School of Medicine	AM,Nastri; AL,Poetranto; ED,Poetranto; SPA,Wahyuningsih; W,Darmanto; EF,Puruhito; L,Wulandari; G,Soegiarto; YK,Shimizu; Y,Mori; K,Shimizu
EPI1215597	MP	Indonesia	2013-Jun-26	EPI_ISL_307026	A/duck/East_Java/Av39/2013	Institute of Tropical Disease, Universitas Airlangga	Kobe University Graduate School of Medicine	AM,Nastri; AL,Poetranto; ED,Poetranto; SPA,Wahyuningsih; W,Darmanto; EF,Puruhito; L,Wulandari; G,Soegiarto; YK,Shimizu; Y,Mori; K,Shimizu
EPI1215593	PB1	Indonesia	2013-Jun-26	EPI_ISL_307026	A/duck/East_Java/Av39/2013	Institute of Tropical Disease, Universitas Airlangga	Kobe University Graduate School of Medicine	AM,Nastri; AL,Poetranto; ED,Poetranto; SPA,Wahyuningsih; W,Darmanto; EF,Puruhito; L,Wulandari; G,Soegiarto; YK,Shimizu; Y,Mori; K,Shimizu
EPI1215591	HA	Indonesia	2013-Jun-26	EPI_ISL_307026	A/duck/East_Java/Av39/2013	Institute of Tropical Disease, Universitas Airlangga	Kobe University Graduate School of Medicine	AM,Nastri; AL,Poetranto; ED,Poetranto; SPA,Wahyuningsih; W,Darmanto; EF,Puruhito; L,Wulandari; G,Soegiarto; YK,Shimizu; Y,Mori; K,Shimizu
EPI1215596	NA	Indonesia	2013-Jun-26	EPI_ISL_307026	A/duck/East_Java/Av39/2013	Institute of Tropical Disease, Universitas Airlangga	Kobe University Graduate School of Medicine	AM,Nastri; AL,Poetranto; ED,Poetranto; SPA,Wahyuningsih; W,Darmanto; EF,Puruhito; L,Wulandari; G,Soegiarto; YK,Shimizu; Y,Mori; K,Shimizu
EPI1215594	PA	Indonesia	2013-Jun-26	EPI_ISL_307026	A/duck/East_Java/Av39/2013	Institute of Tropical Disease, Universitas Airlangga	Kobe University Graduate School of Medicine	AM,Nastri; AL,Poetranto; ED,Poetranto; SPA,Wahyuningsih; W,Darmanto; EF,Puruhito; L,Wulandari; G,Soegiarto; YK,Shimizu; Y,Mori; K,Shimizu
EPI1494304	NA	Indonesia	2018-Feb-12	EPI_ISL_365528	A/chicken/East_Java/Spg119/2018	Institute of Tropical Disease, Universitas Airlangga	Kobe University Graduate School of Medicine	K,Rahardjo; AN,Novianti; RR,Prasetya; AM,Nastri; JR,Dewantari; AP,Rahardjo; ATS,Estoepangestie; YK,Shimizu; ED,Poetranto; G,Soegiarto; Y,Mori; K,Shimizu
EPI1494300	PB1	Indonesia	2018-Feb-12	EPI_ISL_365528	A/chicken/East_Java/Spg119/2018	Institute of Tropical Disease, Universitas Airlangga	Kobe University Graduate School of Medicine	K,Rahardjo; AN,Novianti; RR,Prasetya; AM,Nastri; JR,Dewantari; AP,Rahardjo; ATS,Estoepangestie; YK,Shimizu; ED,Poetranto; G,Soegiarto; Y,Mori; K,Shimizu
EPI1494301	PA	Indonesia	2018-Feb-12	EPI_ISL_365528	A/chicken/East_Java/Spg119/2018	Institute of Tropical Disease, Universitas Airlangga	Kobe University Graduate School of Medicine	K,Rahardjo; AN,Novianti; RR,Prasetya; AM,Nastri; JR,Dewantari; AP,Rahardjo; ATS,Estoepangestie; YK,Shimizu; ED,Poetranto; G,Soegiarto; Y,Mori; K,Shimizu
EPI1494303	NP	Indonesia	2018-Feb-12	EPI_ISL_365528	A/chicken/East_Java/Spg119/2018	Institute of Tropical Disease, Universitas Airlangga	Kobe University Graduate School of Medicine	K,Rahardjo; AN,Novianti; RR,Prasetya; AM,Nastri; JR,Dewantari; AP,Rahardjo; ATS,Estoepangestie; YK,Shimizu; ED,Poetranto; G,Soegiarto; Y,Mori; K,Shimizu
EPI1494305	MP	Indonesia	2018-Feb-12	EPI_ISL_365528	A/chicken/East_Java/Spg119/2018	Institute of Tropical Disease, Universitas Airlangga	Kobe University Graduate School of Medicine	K,Rahardjo; AN,Novianti; RR,Prasetya; AM,Nastri; JR,Dewantari; AP,Rahardjo; ATS,Estoepangestie; YK,Shimizu; ED,Poetranto; G,Soegiarto; Y,Mori; K,Shimizu
EPI1494306	NS	Indonesia	2018-Feb-12	EPI_ISL_365528	A/chicken/East_Java/Spg119/2018	Institute of Tropical Disease, Universitas Airlangga	Kobe University Graduate School of Medicine	K,Rahardjo; AN,Novianti; RR,Prasetya; AM,Nastri; JR,Dewantari; AP,Rahardjo; ATS,Estoepangestie; YK,Shimizu; ED,Poetranto; G,Soegiarto; Y,Mori; K,Shimizu
EPI1494302	HA	Indonesia	2018-Feb-12	EPI_ISL_365528	A/chicken/East_Java/Spg119/2018	Institute of Tropical Disease, Universitas Airlangga	Kobe University Graduate School of Medicine	K,Rahardjo; AN,Novianti; RR,Prasetya; AM,Nastri; JR,Dewantari; AP,Rahardjo; ATS,Estoepangestie; YK,Shimizu; ED,Poetranto; G,Soegiarto; Y,Mori; K,Shimizu
EPI1494299	PB2	Indonesia	2018-Feb-12	EPI_ISL_365528	A/chicken/East_Java/Spg119/2018	Institute of Tropical Disease, Universitas Airlangga	Kobe University Graduate School of Medicine	K,Rahardjo; AN,Novianti; RR,Prasetya; AM,Nastri; JR,Dewantari; AP,Rahardjo; ATS,Estoepangestie; YK,Shimizu; ED,Poetranto; G,Soegiarto; Y,Mori; K,Shimizu
EPI1647331	PB2	Indonesia	2017-Apr-30	EPI_ISL_401823	A/chicken/East_Java/Av1210/2017	Institute of Tropical Disease, Universitas Airlangga	Kobe University Graduate School of Medicine	ED,Poetranto;K,Rahardjo;RR,Prasetya;AM,Nastri;JR,Dewantari;AL,Poetranto;L,Wulandari;G,Soegiarto;YK,Shimizu;Y,Mori;K,Shimizu
EPI1647337	MP	Indonesia	2017-Apr-30	EPI_ISL_401823	A/chicken/East_Java/Av1210/2017	Institute of Tropical Disease, Universitas Airlangga	Kobe University Graduate School of Medicine	ED,Poetranto;K,Rahardjo;RR,Prasetya;AM,Nastri;JR,Dewantari;AL,Poetranto;L,Wulandari;G,Soegiarto;YK,Shimizu;Y,Mori;K,Shimizu
EPI1647332	PB1	Indonesia	2017-Apr-30	EPI_ISL_401823	A/chicken/East_Java/Av1210/2017	Institute of Tropical Disease, Universitas Airlangga	Kobe University Graduate School of Medicine	ED,Poetranto;K,Rahardjo;RR,Prasetya;AM,Nastri;JR,Dewantari;AL,Poetranto;L,Wulandari;G,Soegiarto;YK,Shimizu;Y,Mori;K,Shimizu
EPI1647336	NA	Indonesia	2017-Apr-30	EPI_ISL_401823	A/chicken/East_Java/Av1210/2017	Institute of Tropical Disease, Universitas Airlangga	Kobe University Graduate School of Medicine	ED,Poetranto;K,Rahardjo;RR,Prasetya;AM,Nastri;JR,Dewantari;AL,Poetranto;L,Wulandari;G,Soegiarto;YK,Shimizu;Y,Mori;K,Shimizu
EPI1647334	HA	Indonesia	2017-Apr-30	EPI_ISL_401823	A/chicken/East_Java/Av1210/2017	Institute of Tropical Disease, Universitas Airlangga	Kobe University Graduate School of Medicine	ED,Poetranto;K,Rahardjo;RR,Prasetya;AM,Nastri;JR,Dewantari;AL,Poetranto;L,Wulandari;G,Soegiarto;YK,Shimizu;Y,Mori;K,Shimizu
EPI1647333	PA	Indonesia	2017-Apr-30	EPI_ISL_401823	A/chicken/East_Java/Av1210/2017	Institute of Tropical Disease, Universitas Airlangga	Kobe University Graduate School of Medicine	ED,Poetranto;K,Rahardjo;RR,Prasetya;AM,Nastri;JR,Dewantari;AL,Poetranto;L,Wulandari;G,Soegiarto;YK,Shimizu;Y,Mori;K,Shimizu
EPI1647338	NS	Indonesia	2017-Apr-30	EPI_ISL_401823	A/chicken/East_Java/Av1210/2017	Institute of Tropical Disease, Universitas Airlangga	Kobe University Graduate School of Medicine	ED,Poetranto;K,Rahardjo;RR,Prasetya;AM,Nastri;JR,Dewantari;AL,Poetranto;L,Wulandari;G,Soegiarto;YK,Shimizu;Y,Mori;K,Shimizu
EPI1647335	NP	Indonesia	2017-Apr-30	EPI_ISL_401823	A/chicken/East_Java/Av1210/2017	Institute of Tropical Disease, Universitas Airlangga	Kobe University Graduate School of Medicine	ED,Poetranto;K,Rahardjo;RR,Prasetya;AM,Nastri;JR,Dewantari;AL,Poetranto;L,Wulandari;G,Soegiarto;YK,Shimizu;Y,Mori;K,Shimizu
EPI1647342	HA	Indonesia	2019-Jan-21	EPI_ISL_401824	A/chicken/East_Java/Av1534/2019	Institute of Tropical Disease, Universitas Airlangga	Kobe University Graduate School of Medicine	ED,Poetranto;K,Rahardjo;RR,Prasetya;AM,Nastri;JR,Dewantari;AL,Poetranto;L,Wulandari;G,Soegiarto;YK,Shimizu;Y,Mori;K,Shimizu
EPI1647345	MP	Indonesia	2019-Jan-21	EPI_ISL_401824	A/chicken/East_Java/Av1534/2019	Institute of Tropical Disease, Universitas Airlangga	Kobe University Graduate School of Medicine	ED,Poetranto;K,Rahardjo;RR,Prasetya;AM,Nastri;JR,Dewantari;AL,Poetranto;L,Wulandari;G,Soegiarto;YK,Shimizu;Y,Mori;K,Shimizu
EPI1647346	NS	Indonesia	2019-Jan-21	EPI_ISL_401824	A/chicken/East_Java/Av1534/2019	Institute of Tropical Disease, Universitas Airlangga	Kobe University Graduate School of Medicine	ED,Poetranto;K,Rahardjo;RR,Prasetya;AM,Nastri;JR,Dewantari;AL,Poetranto;L,Wulandari;G,Soegiarto;YK,Shimizu;Y,Mori;K,Shimizu
EPI1647344	NA	Indonesia	2019-Jan-21	EPI_ISL_401824	A/chicken/East_Java/Av1534/2019	Institute of Tropical Disease, Universitas Airlangga	Kobe University Graduate School of Medicine	ED,Poetranto;K,Rahardjo;RR,Prasetya;AM,Nastri;JR,Dewantari;AL,Poetranto;L,Wulandari;G,Soegiarto;YK,Shimizu;Y,Mori;K,Shimizu
EPI1647339	PB2	Indonesia	2019-Jan-21	EPI_ISL_401824	A/chicken/East_Java/Av1534/2019	Institute of Tropical Disease, Universitas Airlangga	Kobe University Graduate School of Medicine	ED,Poetranto;K,Rahardjo;RR,Prasetya;AM,Nastri;JR,Dewantari;AL,Poetranto;L,Wulandari;G,Soegiarto;YK,Shimizu;Y,Mori;K,Shimizu
EPI1647341	PA	Indonesia	2019-Jan-21	EPI_ISL_401824	A/chicken/East_Java/Av1534/2019	Institute of Tropical Disease, Universitas Airlangga	Kobe University Graduate School of Medicine	ED,Poetranto;K,Rahardjo;RR,Prasetya;AM,Nastri;JR,Dewantari;AL,Poetranto;L,Wulandari;G,Soegiarto;YK,Shimizu;Y,Mori;K,Shimizu
EPI1647340	PB1	Indonesia	2019-Jan-21	EPI_ISL_401824	A/chicken/East_Java/Av1534/2019	Institute of Tropical Disease, Universitas Airlangga	Kobe University Graduate School of Medicine	ED,Poetranto;K,Rahardjo;RR,Prasetya;AM,Nastri;JR,Dewantari;AL,Poetranto;L,Wulandari;G,Soegiarto;YK,Shimizu;Y,Mori;K,Shimizu
EPI1647343	NP	Indonesia	2019-Jan-21	EPI_ISL_401824	A/chicken/East_Java/Av1534/2019	Institute of Tropical Disease, Universitas Airlangga	Kobe University Graduate School of Medicine	ED,Poetranto;K,Rahardjo;RR,Prasetya;AM,Nastri;JR,Dewantari;AL,Poetranto;L,Wulandari;G,Soegiarto;YK,Shimizu;Y,Mori;K,Shimizu
EPI2085867	PB2	Indonesia	2022-Mar-05	EPI_ISL_13690275	A/chicken/East_Java/Av1955/2022	Institute of Tropical Disease, Universitas Airlangga	Institute of Tropical Disease, Universitas Airlangga	S,Rehman;FA,Rantam;J,Rahmahani;AM,Witaningrum;RR,Prasetya;K,Rahardjo;AM,Nastri;JR,Dewantari;Y,Mori;K,Shimizu;MH,Effendi
EPI2085871	NP	Indonesia	2022-Mar-05	EPI_ISL_13690275	A/chicken/East_Java/Av1955/2022	Institute of Tropical Disease, Universitas Airlangga	Institute of Tropical Disease, Universitas Airlangga	S,Rehman;FA,Rantam;J,Rahmahani;AM,Witaningrum;RR,Prasetya;K,Rahardjo;AM,Nastri;JR,Dewantari;Y,Mori;K,Shimizu;MH,Effendi
EPI2085870	HA	Indonesia	2022-Mar-05	EPI_ISL_13690275	A/chicken/East_Java/Av1955/2022	Institute of Tropical Disease, Universitas Airlangga	Institute of Tropical Disease, Universitas Airlangga	S,Rehman;FA,Rantam;J,Rahmahani;AM,Witaningrum;RR,Prasetya;K,Rahardjo;AM,Nastri;JR,Dewantari;Y,Mori;K,Shimizu;MH,Effendi
EPI2085873	MP	Indonesia	2022-Mar-05	EPI_ISL_13690275	A/chicken/East_Java/Av1955/2022	Institute of Tropical Disease, Universitas Airlangga	Institute of Tropical Disease, Universitas Airlangga	S,Rehman;FA,Rantam;J,Rahmahani;AM,Witaningrum;RR,Prasetya;K,Rahardjo;AM,Nastri;JR,Dewantari;Y,Mori;K,Shimizu;MH,Effendi
EPI2085868	PB1	Indonesia	2022-Mar-05	EPI_ISL_13690275	A/chicken/East_Java/Av1955/2022	Institute of Tropical Disease, Universitas Airlangga	Institute of Tropical Disease, Universitas Airlangga	S,Rehman;FA,Rantam;J,Rahmahani;AM,Witaningrum;RR,Prasetya;K,Rahardjo;AM,Nastri;JR,Dewantari;Y,Mori;K,Shimizu;MH,Effendi
EPI2085869	PA	Indonesia	2022-Mar-05	EPI_ISL_13690275	A/chicken/East_Java/Av1955/2022	Institute of Tropical Disease, Universitas Airlangga	Institute of Tropical Disease, Universitas Airlangga	S,Rehman;FA,Rantam;J,Rahmahani;AM,Witaningrum;RR,Prasetya;K,Rahardjo;AM,Nastri;JR,Dewantari;Y,Mori;K,Shimizu;MH,Effendi
EPI2085874	NS	Indonesia	2022-Mar-05	EPI_ISL_13690275	A/chicken/East_Java/Av1955/2022	Institute of Tropical Disease, Universitas Airlangga	Institute of Tropical Disease, Universitas Airlangga	S,Rehman;FA,Rantam;J,Rahmahani;AM,Witaningrum;RR,Prasetya;K,Rahardjo;AM,Nastri;JR,Dewantari;Y,Mori;K,Shimizu;MH,Effendi
EPI2085872	NA	Indonesia	2022-Mar-05	EPI_ISL_13690275	A/chicken/East_Java/Av1955/2022	Institute of Tropical Disease, Universitas Airlangga	Institute of Tropical Disease, Universitas Airlangga	S,Rehman;FA,Rantam;J,Rahmahani;AM,Witaningrum;RR,Prasetya;K,Rahardjo;AM,Nastri;JR,Dewantari;Y,Mori;K,Shimizu;MH,Effendi
